# Supplementary material
Source: PubMed Central journal article supplement (PMC5050111)
Supplement: NIHMS804899-supplement-1.pdf [file NIHMS804899-supplement-1.pdf]

**Table S1. ALK Inhibitors in Clinical Development**

| <b>Generation</b>                | <b>Agent</b>            | <b>Manufacturer</b> |
|----------------------------------|-------------------------|---------------------|
| <b>1<sup>st</sup> Generation</b> | Crizotinib <sup>a</sup> | Pfizer              |
| <b>2<sup>nd</sup> Generation</b> | Ceritinib <sup>a</sup>  | Novartis            |
|                                  | Alectinib <sup>a</sup>  | Genentech/Roche     |
|                                  | Brigatinib              | Ariad               |
|                                  | Entrectinib             | Ignitya             |
|                                  | X-396                   | Xcovery             |
| <b>3<sup>rd</sup> Generation</b> | Lorlatinib              | Pfizer              |

<sup>a</sup>Agents that are currently approved by the U.S. Food and Drug Administration

**Table S2. Summary of Clinical Characteristics of ALK-Positive Patients Undergoing Biopsies at the Time of ALK Inhibitor Resistance**

|                                       | <b>Crizotinib-Resistant Biopsies</b> | <b>Ceritinib-Resistant Biopsies</b> | <b>Alectinib-Resistant Biopsies</b> | <b>Brigatinib-Resistant Biopsies</b> |
|---------------------------------------|--------------------------------------|-------------------------------------|-------------------------------------|--------------------------------------|
| Patients (N)                          | 51 <sup>a</sup>                      | 23 <sup>b</sup>                     | 17                                  | 6 <sup>b</sup>                       |
| Age (yrs)                             |                                      |                                     |                                     |                                      |
| Median                                | 54                                   | 47                                  | 54                                  | 48.5                                 |
| Range                                 | 22-78                                | 22-78                               | 32-67                               | 38-67                                |
| Gender – no. (%)                      |                                      |                                     |                                     |                                      |
| Male                                  | 26 (51)                              | 7 (30)                              | 8 (47)                              | 5 (83)                               |
| Female                                | 25 (49)                              | 16 (70)                             | 9 (53)                              | 1 (17)                               |
| Race – no. (%)                        |                                      |                                     |                                     |                                      |
| Caucasian                             | 42 (82)                              | 20 (87)                             | 17 (100)                            | 4 (60)                               |
| Asian                                 | 6 (12)                               | 3 (13)                              | 0 (0)                               | 1 (20)                               |
| Other                                 | 3 (6)                                | 0 (0)                               | 0 (0)                               | 1 (20)                               |
| Prior ALK Inhibitors – no. (%)        |                                      |                                     |                                     |                                      |
| Crizotinib                            | 51 (100)                             | 21 (91)                             | 17 (100)                            | 5 (83)                               |
| Ceritinib                             | 1 (2)                                | 23 (100)                            | 3 (18)                              | -                                    |
| Alectinib                             | -                                    | 3 (13)                              | 17 (100)                            | -                                    |
| Brigatinib                            | -                                    | -                                   | -                                   | 6 (100)                              |
| Site of Biopsy – no. (%)              |                                      |                                     |                                     |                                      |
| Pleura/Pleural Effusion               | 17 (31)                              | 4 (17)                              | 3 (18)                              | 0 (0)                                |
| Liver                                 | 12 (22)                              | 7 (29)                              | 7 (41)                              | 1 (14)                               |
| Lymph Node                            | 10 (18)                              | 1 (4)                               | 3 (17)                              | 4 (57)                               |
| Lung                                  | 6 (11)                               | 7 (29)                              | 2 (12)                              | 1 (14)                               |
| Brain                                 | 3 (5)                                | 1 (4)                               | 0 (0)                               | 0 (0)                                |
| Other <sup>c</sup>                    | 7 (13)                               | 4 (17)                              | 2 (12)                              | 1 (14)                               |
| Sequencing for ALK Mutations– no. (%) |                                      |                                     |                                     |                                      |
| Sanger Sequencing (cDNA)              | 44 (81)                              | 9 (38)                              | 3 (18)                              | 1 (14)                               |
| Sanger Sequencing (gDNA)              | 2 (4)                                | 1 (4)                               | 0 (0)                               | 1 (14)                               |
| Targeted Next-Generation Sequencing   | 8 (15) <sup>d</sup>                  | 14 (58)                             | 14 (82)                             | 4 (57) <sup>d</sup>                  |

<sup>a</sup>Four patients underwent 2 separate biopsies. <sup>b</sup>One patient underwent 2 separate biopsies. <sup>c</sup>Not available in 3 patients. <sup>d</sup>One additional specimen underwent whole-exome sequencing. Percentages may not add up to 100% due to rounding.

**Table S3. ALK-Positive Patients with Paired, Post-Crizotinib and Post Second-Generation ALK Inhibitor Biopsies**

| Post-Crizotinib Samples |               |                         | Post 2 <sup>nd</sup> Generation ALK Inhibitor Samples |                                      |                              |               |                                            |
|-------------------------|---------------|-------------------------|-------------------------------------------------------|--------------------------------------|------------------------------|---------------|--------------------------------------------|
| ID                      | Biopsy Site   | ALK Resistance Mutation | 2 <sup>nd</sup> Generation ALK Inhibitor              | Best Response by RECIST <sup>a</sup> | Duration of Therapy (months) | Biopsy Site   | ALK Resistance Mutation                    |
| MGH011                  | Lung          | S1206Y                  | Ceritinib                                             | PR                                   | 15.4                         | Lung          | G1202R                                     |
| MGH015                  | Lung          | WT                      | Ceritinib                                             | N/A                                  | 8.2                          | Bone          | WT                                         |
| MGH023                  | Liver         | WT                      | Ceritinib                                             | PR                                   | 8.7                          | Liver         | F1174C                                     |
| MGH034                  | Liver         | WT                      | Ceritinib                                             | PR                                   | 9.8                          | Liver         | WT                                         |
| MGH040                  | Node          | WT                      | Ceritinib                                             | PR                                   | 34.1                         | Lung          | G1202R                                     |
| MGH049                  | Lung          | WT                      | Ceritinib                                             | PR                                   | 7.1                          | Pleural fluid | WT                                         |
| MGH051                  | Liver         | WT                      | Ceritinib                                             | PR                                   | 6.5                          | Liver         | G1202R                                     |
| MGH061                  | Brain         | WT                      | Ceritinib                                             | SD                                   | 7.6                          | Brain         | WT                                         |
| MGH065                  | Node          | WT                      | Ceritinib                                             | PR                                   | 8.4                          | Adrenal       | L1196M                                     |
| MGH087                  | Node          | WT                      | Alectinib                                             | SD                                   | 14.7                         | Lung          | V1180L                                     |
| MGH090                  | Node          | WT                      | Alectinib                                             | SD                                   | 2.1                          | Peritoneum    | WT                                         |
| MGH098                  | Pleural fluid | WT                      | Alectinib                                             | SD                                   | 3.2                          | Pleural fluid | WT                                         |
| MGH032                  | Liver         | WT                      | Brigatinib                                            | N/A                                  | N/A                          | CNS           | G1202R                                     |
| MGH086 <sup>b</sup>     | Node          | E1210K                  | Brigatinib                                            | N/A                                  | NR                           | Node          | (1) E1210K + S1206C<br>(2) E1210K + D1203N |

<sup>a</sup>Ceritinib response assessments were performed using RECIST version 1.0; alectinib assessments were performed using RECIST version 1.1.

<sup>b</sup>Patient MGH086 underwent two separate post-brigatinib biopsies.

Abbreviations: anaplastic lymphoma kinase, ALK; central nervous system, CNS; not available, N/A; not reached, NR; RECIST, Response Evaluation Criteria in Solid Tumors

**Table S4. Treatment Course of ALK-Positive Patients Undergoing Post-Ceritinib Biopsies**

| <b>ID</b>           | <b>Crizotinib – Duration of Therapy (Months)</b> | <b>Intervening Therapy Between Crizotinib and Ceritinib</b>        | <b>Ceritinib – Duration of Therapy (Months)</b> | <b>Site of Ceritinib-Resistant Biopsy</b> | <b>ALK Resistance Mutation</b> | <b>Immediate Post-Ceritinib Therapy</b> |
|---------------------|--------------------------------------------------|--------------------------------------------------------------------|-------------------------------------------------|-------------------------------------------|--------------------------------|-----------------------------------------|
| MGH011              | 35.1                                             | -                                                                  | 15.4                                            | Lung                                      | G1202R                         | Chemotherapy                            |
| MGH015              | 20.6                                             | (1) Chemotherapy<br>(2) Clinical Trial #1<br>(3) Clinical Trial #2 | 8.2                                             | Bone                                      | WT                             | None                                    |
| MGH023              | 17.0                                             | (1) Chemotherapy<br>(2) Clinical Trial                             | 8.7                                             | Liver                                     | F1174C                         | None                                    |
| MGH034              | 8.4                                              | -                                                                  | 9.8                                             | Liver                                     | WT                             | Clinical Trial                          |
| MGH040              | 9.8                                              | -                                                                  | 34.1                                            | Lung                                      | G1202R                         | Clinical Trial                          |
| MGH036/49           | 13.7                                             | -                                                                  | 7.1                                             | Pleural fluid                             | WT                             | Clinical Trial                          |
| MGH051              | 2.8                                              | -                                                                  | 6.5                                             | Liver                                     | G1202R                         | Chemotherapy                            |
| MGH057              | 8.1                                              | -                                                                  | 5.8                                             | Liver                                     | WT                             | None                                    |
| MGH061              | 8.3                                              | -                                                                  | 7.6                                             | Brain                                     | WT                             | None                                    |
| MGH065              | 5.6                                              | -                                                                  | 8.4                                             | Adrenal                                   | L1196M                         | Chemotherapy                            |
| MGH067              | 6.5                                              | (1) Chemotherapy<br>(2) Alectinib<br>(3) Chemotherapy              | 2.3                                             | Subcutaneous mass                         | L1196M                         | None                                    |
| MGH068              | 10.5                                             | (1) Chemotherapy                                                   | 14.7                                            | Liver                                     | F1174C                         | None                                    |
| MGH075 <sup>a</sup> | N/A                                              | N/A                                                                | 7.1                                             | Lung                                      | WT                             | Chemotherapy                            |
| MGH084              | 18.2                                             | (1) Alectinib                                                      | 8.2                                             | Liver                                     | I1171N, C1156Y                 | Clinical Trial                          |
| MGH089              | 5.8                                              | -                                                                  | 1.1                                             | Pleural fluid                             | WT                             | Alectinib                               |
| MGH092              | 10.3                                             | -                                                                  | 12.0                                            | Lung                                      | G1202del                       | Chemotherapy                            |
| MGH901              | 28.4                                             | (1) Alectinib<br>(2) Chemotherapy                                  | 9.2                                             | N/A                                       | G1202R                         | N/A                                     |
| MGH902              | 4.8                                              | -                                                                  | 3.0                                             | Lung                                      | WT                             | Chemotherapy                            |
| MGH905              | 8.2                                              | -                                                                  | 27.1                                            | Liver                                     | F1174C, D1203N                 | Clinical Trial                          |
| MGH908              | 7.6                                              | -                                                                  | 7.8                                             | Pleural fluid                             | WT                             | Clinical Trial                          |
| MGH915 <sup>a</sup> | N/A                                              | N/A                                                                | 32.7                                            | Lung                                      | WT                             | Clinical Trial                          |

|        |     |   |     |      |                                |              |
|--------|-----|---|-----|------|--------------------------------|--------------|
| MGH932 | 7.1 | - | N/A | Node | C1156Y,<br>G1202del,<br>V1180L | N/A          |
| MGH970 | 7.2 | - | 5.5 | Lung | F1174L, G1202R                 | Chemotherapy |

<sup>a</sup>Patients MGH075 and MGH915 were treated with first-line ceritinib.

Abbreviations: anaplastic lymphoma kinase, ALK; not available, N/A; wild-type, WT

**Table S5. Treatment Course of ALK-Positive Patients Undergoing Post-Alectinib Biopsies**

| ID     | Crizotinib – Duration of Therapy (Months) | Intervening Therapy Between Crizotinib and Alectinib  | Alectinib – Duration of Therapy (Months) | Site of Alectinib-Resistant Biopsy | ALK Resistance Mutation | Immediate Post-Alectinib Therapy |
|--------|-------------------------------------------|-------------------------------------------------------|------------------------------------------|------------------------------------|-------------------------|----------------------------------|
| MGH056 | 14.0                                      | -                                                     | 4.2                                      | Liver                              | I1171T                  | Chemotherapy                     |
| MGH063 | 27.4                                      | -                                                     | 7.4                                      | Pleural fluid                      | WT                      | Ceritinib                        |
| MGH074 | 26.1                                      | -                                                     | 21.1                                     | Lymph node                         | WT                      | Clinical trial                   |
| MGH087 | 11.5                                      | -                                                     | 14.7                                     | Lung                               | V1180L                  | Ceritinib                        |
| MGH090 | 19.5                                      | -                                                     | 2.1                                      | Peritoneum                         | WT                      | None                             |
| MGH098 | 5.8                                       | -                                                     | 3.2                                      | Pleural fluid                      | WT                      | Chemotherapy                     |
| MGH099 | 7.7                                       | -                                                     | 6.7                                      | Liver                              | WT                      | Clinical Trial                   |
| MGH907 | 20.0                                      | Ceritinib                                             | 5.1                                      | Lung                               | WT                      | None                             |
| MGH910 | 8.1                                       | (1) Chemotherapy<br>(2) Chemotherapy<br>(3) Ceritinib | 1.3                                      | Liver                              | G1202R                  | Lost to follow-up                |
| MGH913 | 8.8                                       | -                                                     | 15.1                                     | Adrenal                            | I1171S                  | Chemotherapy                     |
| MGH917 | 14.4                                      | -                                                     | 33.0                                     | Lymph node                         | G1202R                  | Lost to follow-up                |
| MGH919 | 1.7                                       | -                                                     | 1.8                                      | Liver                              | G1202R                  | Chemotherapy                     |
| MGH921 | 0.6                                       | -                                                     | 15.2                                     | Lymph node                         | WT                      | Clinical trial                   |
| MGH935 | 41.6                                      | -                                                     | 12.2                                     | Liver                              | G1202R                  | Clinical trial                   |
| MGH936 | 9.6                                       | -                                                     | 16.0                                     | Liver                              | G1202R                  | Clinical trial                   |
| MGH964 | 6.7                                       | Ceritinib                                             | 7.6                                      | Pleural fluid                      | WT                      | Clinical trial                   |
| MGH988 | 12.1                                      | Chemotherapy                                          | 26.1                                     | Liver                              | L1196M                  | Lost to follow-up                |

Abbreviations: anaplastic lymphoma kinase, ALK; wild-type, WT

**Table S6. Treatment Course of ALK-Positive Patients Undergoing Post-Brigatinib Biopsies**

| <b>ID</b> | <b>Crizotinib – Duration of Therapy (Months)</b> | <b>Intervening Therapy Between Crizotinib and Brigatinib</b> | <b>Brigatinib – Duration of Therapy (Months)</b> | <b>Site of Post-Brigatinib Biopsy</b> | <b>ALK Resistance Mutation</b>                   | <b>Immediate Post-Brigatinib Therapy</b> |
|-----------|--------------------------------------------------|--------------------------------------------------------------|--------------------------------------------------|---------------------------------------|--------------------------------------------------|------------------------------------------|
| MGH032    | 13.4                                             | (1) Chemotherapy<br>(2) Clinical Trial<br>(3) Clinical Trial | N/A <sup>a</sup>                                 | Central nervous system                | G1202R                                           | Lost to follow-up                        |
| MGH086    | 21.0                                             | -                                                            | 44.4 <sup>b</sup>                                | Lymph node                            | (1): E1210K + S1206C<br><br>(2): E1210K + D1203N | None <sup>b</sup>                        |
| MGH093    | 14.5                                             | -                                                            | 20.2                                             | Lung                                  | G1202R                                           | Clinical trial                           |
| MGH900    | 1.6 <sup>c</sup>                                 | -                                                            | 18.1                                             | Lymph node                            | WT                                               | Clinical trial                           |
| MGH9003-1 | 20.7                                             | -                                                            | 12.1                                             | Liver                                 | G1202R                                           | Chemotherapy                             |
| MGH952    | N/A                                              | -                                                            | 28.1 <sup>b</sup>                                | Lymph node                            | WT                                               | None <sup>b</sup>                        |

<sup>a</sup>Specific dates surrounding therapy were not available.

<sup>b</sup>Remains on therapy to date.

<sup>c</sup>Discontinued due to hepatotoxicity.

Abbreviations: anaplastic lymphoma kinase, ALK; wild-type, WT

**Table S7. Second-Generation ALK Inhibitor-Resistant Specimens with  $\geq 2$  ALK Resistance Mutations**

| <b>Specimen</b> | <b>ALK Inhibitors<br/>(Prior To Biopsy)</b> | <b>ALK Resistance Mutations</b> |
|-----------------|---------------------------------------------|---------------------------------|
| MGH084-1        | Crizotinib, Alectinib, Ceritinib            | I1171N, C1156Y                  |
| MGH905-1        | Crizotinib, Ceritinib                       | D1203N, F1174C                  |
| MGH932-1        | Crizotinib, Ceritinib                       | C1156Y, G1202del, V1180L        |
| MGH970-1        | Crizotinib, Ceritinib                       | F1174L, G1202R                  |
| MGH086-0        | Crizotinib, Brigatinib                      | E1210K, S1206C                  |
| MGH086-1        | Crizotinib, Brigatinib                      | E1210K, D1203N                  |



**Table S8: Distribution of Mutations in Ceritinib-Resistant Biopsies**

| MGH ID   | Sequencing Platform | ALK Resistance Mutation      | Gene                                  | Alteration                                   |
|----------|---------------------|------------------------------|---------------------------------------|----------------------------------------------|
| MGH040-2 | Snapshot-NGS-V1     | G1202R                       | MET                                   | T992I                                        |
| MGH065-2 | Snapshot-NGS-V1     | L1196M                       | TP53                                  | S314fs                                       |
| MGH068-2 | Snapshot-NGS-V1     | F1174C                       | -                                     | -                                            |
| MGH092-1 | Snapshot-NGS-V1     | G1202del                     | -                                     | -                                            |
| MGH902-1 | Snapshot-NGS-V1     | WT                           | -                                     | -                                            |
| MGH905-1 | Snapshot-NGS-V1     | F1174C<br>D1203N             | FGFR2                                 | F645L                                        |
| MGH908-1 | Snapshot-NGS-V1     | WT                           | BRAF<br>TP53                          | G615V<br>L321fs                              |
| MGH915-0 | Snapshot-NGS-V1     | WT                           | -                                     | -                                            |
| MGH015-2 | Foundation One™     | WT                           | NKX2-1                                | Amplification                                |
| MGH084-1 | Foundation One™     | C1156Y<br>I1171N             | -                                     | -                                            |
| MGH901-1 | Foundation One™     | G1202R                       | -                                     | -                                            |
| MGH932-1 | Foundation One™     | C1156Y<br>V1180L<br>G1202del | CDKN2A/B<br>NOTCH2<br>NOTCH2<br>ARID2 | Loss<br>S2395*<br>S2437*<br>Loss (exons 1-3) |
| MGH970-1 | Foundation One™     | F1174L<br>G1202R             | ACVR1B<br>APC                         | Y151*<br>I1307K                              |

**Table S9: Distribution of Mutations in Alectinib-Resistant Biopsies**

| <b>MGH ID</b>   | <b>Sequencing Platform</b> | <b>ALK Resistance Mutation</b> | <b>Gene</b>    | <b>Alteration</b>                |
|-----------------|----------------------------|--------------------------------|----------------|----------------------------------|
| <b>MGH074-2</b> | Snapshot-NGS-V1            | WT                             | PIK3CA<br>TP53 | G106V<br>E224D                   |
| <b>MGH087-2</b> | Snapshot-NGS-V1            | V1180L                         | DDR2<br>TP53   | L610F<br>I195T                   |
| <b>MGH098-2</b> | Snapshot-NGS-V1            | WT                             | -              | -                                |
| <b>MGH099-1</b> | Snapshot-NGS-V1            | WT                             | TP53           | Splice acceptor variant          |
| <b>MGH907-1</b> | Snapshot-NGS-V1            | WT                             | -              | -                                |
| <b>MGH910-1</b> | Snapshot-NGS-V1            | G1202R                         | TP53           | C176Y                            |
| <b>MGH913-1</b> | Snapshot-NGS-V1            | I1171S                         | TP53           | R248W                            |
| <b>MGH917-1</b> | Snapshot-NGS-V1            | G1202R                         | TP53           | V172F                            |
| <b>MGH919-4</b> | Snapshot-NGS-V1            | G1202R                         | -              | -                                |
| <b>MGH921-1</b> | Snapshot-NGS-V1            | WT                             | TP53           | V1173G                           |
| <b>MGH936-1</b> | Snapshot-NGS-V1            | G1202R                         | -              | -                                |
| <b>MGH964-1</b> | Snapshot-NGS-V1            | WT                             | BRAF<br>NRAS   | Splice acceptor variant<br>A155T |

**Table S10: Distribution of Mutations in Brigatinib-Resistant Biopsies by Snapshot**

| <b>MGH ID</b>    | <b>Sequencing Platform</b> | <b>ALK Resistance Mutation</b> | <b>Gene</b> | <b>Alteration</b> |
|------------------|----------------------------|--------------------------------|-------------|-------------------|
| <b>MGH9003-1</b> | Snapshot-NGS-V1            | G1202R                         | -           | -                 |
| <b>MGH952-1</b>  | Snapshot-NGS-V1            | WT                             | -           | -                 |

**Table S11. Single-Nucleotide Variants Identified in Patient-Derived ALK-Positive Cell Lines by NGS**

| Cell line        | Control | 2° ALK mutation | Gene    | cDNA change | AA change | Allelic Fraction |
|------------------|---------|-----------------|---------|-------------|-----------|------------------|
| <b>MGH021-5A</b> | HapMap  | G1202R          | AKT1    | 655A>C      | T219P     | 0.088            |
|                  |         |                 | ALK     | 3604G>A     | G1202R    | 0.430            |
|                  |         |                 | ALPK3   | 4698G>C     | E1566D    | 0.489            |
|                  |         |                 | ARID1A  | 3778T>C     | Y1260H    | 0.059            |
|                  |         |                 | CADM1   | 1064T>G     | V355G     | 0.044            |
|                  |         |                 | CADM1   | 1070T>G     | V357G     | 0.039            |
|                  |         |                 | CAMK2B  | 1918A>C     | T640P     | 0.049            |
|                  |         |                 | CBLB    | 1754A>C     | D585A     | 0.031            |
|                  |         |                 | CBLC    | 397G>A      | A133T     | 0.536            |
|                  |         |                 | CDK4    | 409G>A      | V137I     | 0.471            |
|                  |         |                 | COL1A1  | 1259C>G     | P420R     | 0.520            |
|                  |         |                 | CREB3L2 | 1406C>A     | P469Q     | 0.457            |
|                  |         |                 | DGKZ    | 3316C>A     | Q1106K    | 0.048            |
|                  |         |                 | DYRK1B  | 212C>G      | A71G      | 0.075            |
|                  |         |                 | EPHA1   | 1679C>G     | A560G     | 0.490            |
|                  |         |                 | EPHA1   | 529A>C      | T177P     | 0.075            |
|                  |         |                 | FGFR3   | 797T>G      | V266G     | 0.051            |
|                  |         |                 | IL21R   | 1445T>C     | L482P     | 0.113            |
|                  |         |                 | IP6K1   | 1033C>G     | R345G     | 0.039            |
|                  |         |                 | IRS2    | 275T>G      | V92G      | 0.037            |
|                  |         |                 | MAP3K6  | 2246G>T     | S749I     | 0.034            |
|                  |         |                 | MEF2B   | 130G>C      | A44P      | 0.032            |
|                  |         |                 | MITF    | 283A>C      | T95P      | 0.046            |

|                  |       |                |         |           |          |       |
|------------------|-------|----------------|---------|-----------|----------|-------|
|                  |       |                | MYCL1   | 518C>G    | A173G    | 0.458 |
|                  |       |                | MYLK    | 5395A>G   | R1799G   | 0.024 |
|                  |       |                | OBSCN   | 3269C>G   | A1090G   | 0.032 |
|                  |       |                | OBSCN   | 5201C>G   | A1734G   | 0.028 |
|                  |       |                | PIK3C2B | 485G>A    | R162Q    | 0.492 |
|                  |       |                | PIP4K2B | 38T>G     | V13G     | 0.149 |
|                  |       |                | RIPK2   | 100T>C    | S34P     | 0.037 |
|                  |       |                | ROCK1   | 3649C>G   | Q1217E   | 0.078 |
|                  |       |                | ROR2    | 433A>C    | T145P    | 0.051 |
|                  |       |                | SPEG    | 9038T>G   | V3013G   | 0.026 |
|                  |       |                | STK38L  | 415A>G    | R139G    | 0.422 |
|                  |       |                | TAOK2   | 2116A>C   | T706P    | 0.043 |
|                  |       |                | TRPM6   | 218C>T    | A73V     | 0.471 |
|                  |       |                | ULK2    | 280G>A    | A94T     | 0.477 |
|                  |       |                | WIF1    | 722G>A    | C241Y    | 0.423 |
| <b>MGH051-2</b>  | Blood | G1202R         | ALK     | c.3604G>A | p.G1202R | 0.288 |
|                  |       |                | KDM6A   | c.1525C>T | p.Q509*  | 0.952 |
|                  |       |                | KIT     | c.2866C>T | p.R956W  | 0.107 |
|                  |       |                | MAP3K6  | c.274C>T  | p.R92C   | 0.657 |
|                  |       |                | PRKCB   | c.841G>A  | p.E281K  | 0.343 |
|                  |       |                | TRRAP   | c.1892T>G | p.L631W  | 0.279 |
| <b>MGH075-2E</b> | Blood | WT             | AR      | c.170T>A  | p.L57Q   | 0.459 |
|                  |       |                | CSMD3   | c.1186G>A | p.V396M  | 0.321 |
|                  |       |                | GRK6    | c.1109T>A | p.V370D  | 0.060 |
|                  |       |                | ROCK2   | c.3779G>T | p.G1260V | 0.305 |
|                  |       |                | TP53    | c.839G>C  | p.R280T  | 1.000 |
| <b>MGH084-1D</b> | Blood | I1171N, C1156Y | EPS15   | c.1497G>A | p.M499I  | 0.504 |

|  |  |  |       |           |          |       |
|--|--|--|-------|-----------|----------|-------|
|  |  |  | AKT3  | c.1034C>A | p.P345H  | 0.192 |
|  |  |  | ALK   | c.3512T>A | p.I1171N | 0.168 |
|  |  |  | ALK   | c.3467G>A | p.C1156Y | 0.161 |
|  |  |  | MYO3B | c.583C>T  | p.P195S  | 0.658 |
|  |  |  | MLTK  | c.1672G>A | p.D558N  | 0.293 |
|  |  |  | STK16 | c.14T>A   | p.L5Q    | 0.339 |
|  |  |  | EPHA6 | c.1697C>T | p.A566V  | 0.290 |
|  |  |  | TFG   | c.1075C>G | p.P359A  | 0.232 |
|  |  |  | DGKB  | c.1337A>T | p.K446I  | 0.186 |
|  |  |  | PRKD1 | c.1349G>A | p.C450Y  | 0.211 |
|  |  |  | TSC2  | c.3725A>G | p.K1242R | 0.220 |
|  |  |  | PIM3  | c.239G>A  | p.G80D   | 0.382 |
|  |  |  | ATRX  | c.2719C>T | p.R907*  | 0.561 |

**Table S12: Assessments of Epithelial Mesenchymal Transition in Ceritinib-Resistant Biopsies**

| ID     | Baseline, Initial Diagnostic Specimen |            | Ceritinib-Resistant Specimen |                       |
|--------|---------------------------------------|------------|------------------------------|-----------------------|
|        | Vimentin                              | E-Cadherin | Vimentin                     | E-Cadherin            |
| MGH023 | Negative                              | Positive   | Positive                     | Negative              |
| MGH034 | Negative                              | Positive   | Positive                     | Negative              |
| MGH065 | Positive                              | Positive   | Positive                     | Negative              |
| MGH067 | Negative                              | Positive   | Positive                     | Negative              |
| MGH902 | Negative                              | Positive   | Positive                     | Negative <sup>a</sup> |

<sup>a</sup>Partial loss

**Table S13. Cells Seeded for Survival Assays**

| <b>Cell line</b> | <b>Cell seeding</b> | <b>Assay time (d)</b> | <b>Proliferation index</b> |
|------------------|---------------------|-----------------------|----------------------------|
| <b>MGH034-2A</b> | 4000                | 7                     | 5.1                        |
| <b>MGH049-1A</b> | 2000                | 5                     | 4.2                        |
| <b>MGH075-2E</b> | 7500                | 3                     | 4.2                        |
| <b>MGH021-5A</b> | 4000                | 7                     | 3.9                        |
| <b>MGH051-2C</b> | 5000                | 5                     | 4                          |
| <b>MGH084-1D</b> | 8000                | 14                    | 3.9                        |



**Table S14. Cells Seeded for Growth Assays**

| <b>Cell line</b> | <b>Cell seeding</b> |
|------------------|---------------------|
| <b>MGH034-2A</b> | 4000                |
| <b>MGH049-1A</b> | 1500                |
| <b>MGH075-2E</b> | 2000                |
| <b>MGH021-5A</b> | 5000                |
| <b>MGH051-2C</b> | 4000                |
| <b>MGH084-1D</b> | 8000                |
